# Supplementary material
Source: PubMed Central journal article supplement (PMC3876814)
Supplement: supp_mol.113.086413_sox9a_jaw_and_epicardium_figure.pdf [file supp_mol.113.086413_sox9a_jaw_and_epicardium_figure.pdf]

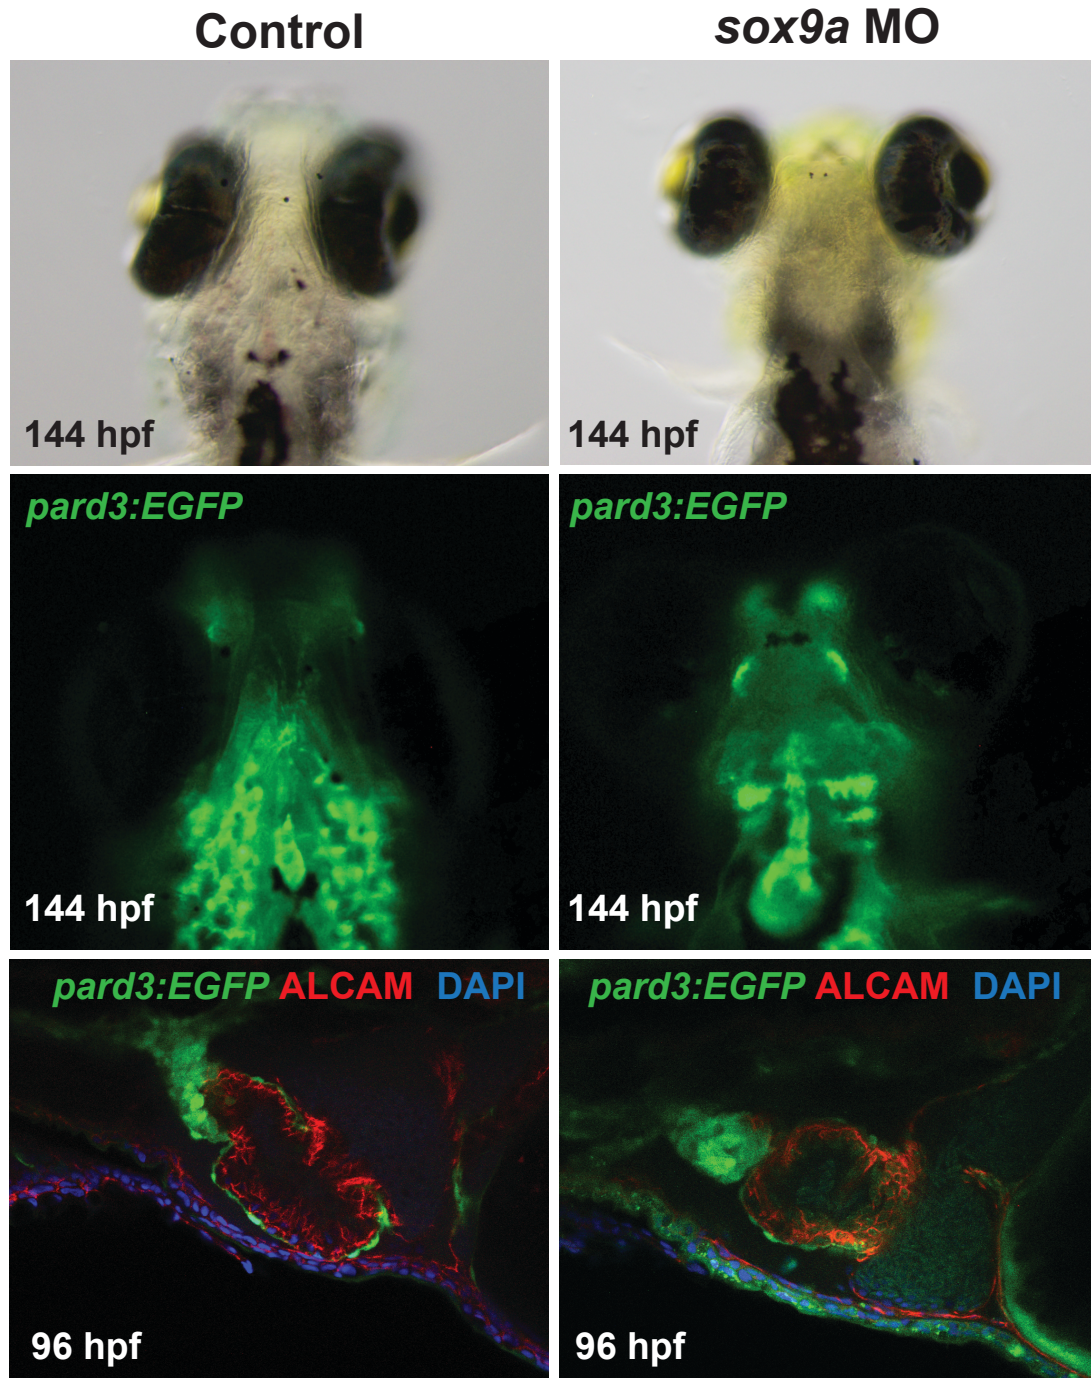

Supplemental Figure 1:

Sox9b is required for epicardium formation and plays a role in TCDD-induced heart malformation in zebrafish. Peter Hofsteen, Jessica Plavicki, Shaina D. Johnson, Richard E. Peterson, and Warren Heideman. Molecular Pharmacology. Figure S1. Sox9a is not required for zebrafish epicardium development. Transgenic *pard3:EGFP* fish were injected with *sox9a* MO or at the 1-4 cell stage. Shown are representative images of control MO (A, C) *sox9a* morphants (B, D) at 96 (confocal ventral-lateral anterior to the left; C, D) and 144 hpf (brightfield ventral anterior to the top; A, B). Black lines denote position of snout (A, B) and white arrowheads mark epicardial cells (C, D). Fish analyzed for epicardium development were counterstained with ALCAM in red and DAPI in blue (minimum n= 10 per group).
